# Supplementary material for: Effect of Monthly Vitamin D Supplementation on Preventing Exacerbations of Asthma or Chronic Obstructive Pulmonary Disease in Older Adults: Post Hoc Analysis of a Randomized Controlled Trial
Source: PubMed Central journal article supplement (PMC7915442; doi:10.3390/nu13020521), 2021-02-06
Supplement: nutrients-13-00521-s001.pdf [file nutrients-13-00521-s001.pdf]

## ONLINE SUPPLEMENT

### **Effect of monthly vitamin D supplementation on preventing exacerbations of asthma or chronic obstructive pulmonary disease in older adults: *post hoc* analysis of a randomized controlled trial**

Carlos A. Camargo Jr., MD DrPH <sup>1,\*</sup>, Les Toop, MBChB MD <sup>2</sup>, John Sluyter, PhD <sup>3</sup>, Carlene M.M. Lawes, MBChB PhD <sup>3</sup>, Debbie Waayer, MEd <sup>3</sup>, Kay-Tee Khaw, MBBChir MSc <sup>4</sup>, Adrian R Martineau, MBBS PhD <sup>5</sup> and Robert Scragg, MBBS PhD <sup>3</sup>

<sup>1</sup> Department of Emergency Medicine, Massachusetts General Hospital, Harvard Medical School, Boston, USA; [ccamargo@partners.org](mailto:ccamargo@partners.org)

<sup>2</sup> Department of General Practice, University of Otago, Christchurch, New Zealand; [les.toop@otago.ac.nz](mailto:les.toop@otago.ac.nz)

<sup>3</sup> School of Population Health, University of Auckland, Auckland, New Zealand; [j.sluyter@auckland.ac.nz](mailto:j.sluyter@auckland.ac.nz), [Carlene.Lawes@waitematadhb.govt.nz](mailto:Carlene.Lawes@waitematadhb.govt.nz), [d.waayer@auckland.ac.nz](mailto:d.waayer@auckland.ac.nz), and [r.scragg@auckland.ac.nz](mailto:r.scragg@auckland.ac.nz)

<sup>4</sup> Department of Public Health and Primary Care, University of Cambridge, Cambridge, UK; [kk101@cam.ac.uk](mailto:kk101@cam.ac.uk)

<sup>5</sup> Institute for Population Health Sciences, Barts and The London School of Medicine and Dentistry, Queen Mary University of London, London, UK; [a.martineau@qmul.ac.uk](mailto:a.martineau@qmul.ac.uk)

\* Correspondence: [ccamargo@partners.org](mailto:ccamargo@partners.org)

#### **TABLE OF CONTENTS**

- **Table S1.** Baseline comparison of the vitamin D supplemented and placebo groups among participants with 25-hydroxyvitamin D <25 nmol/L.
- **Table S2:** Hazard ratios for exacerbations of asthma or chronic obstructive pulmonary disease, adjusted for other variables in the table, in the placebo group only (n=373).

**Table S1.** Baseline comparison of the vitamin D supplemented and placebo groups among participants with 25-hydroxyvitamin D <25 nmol/L.

| Variable                                                 | Vitamin D<br>(n=8) | Placebo<br>(n=10) | P-value |
|----------------------------------------------------------|--------------------|-------------------|---------|
| Age (years)                                              |                    |                   |         |
| 50-59                                                    | 3 (37.5)           | 2 (20.0)          | 0.64    |
| 60-69                                                    | 2 (25.0)           | 4 (40.0)          |         |
| 70-79                                                    | 2 (25.0)           | 4 (40.0)          |         |
| 80-84                                                    | 1 (12.5)           | 0 (0.0)           |         |
| Sex – male                                               | 6 (75.0)           | 6 (60.0)          | 0.32    |
| Ethnicity                                                |                    |                   |         |
| Māori                                                    | 0 (0.0)            | 0 (0.0)           | 0.64    |
| Pacific Island                                           | 0 (0.0)            | 2 (20.0)          |         |
| South Asian                                              | 3 (37.5)           | 3 (30.0)          |         |
| European / Other                                         | 5 (62.5)           | 5 (50.0)          |         |
| Education (highest level) <sup>a</sup>                   |                    |                   |         |
| Primary school                                           | 0 (0.0)            | 1 (10.0)          | 1.00    |
| Secondary school                                         | 3 (37.5)           | 4 (40.0)          |         |
| Tertiary                                                 | 5 (62.5)           | 5 (50.0)          |         |
| In paid employment <sup>a</sup>                          |                    |                   |         |
| Yes                                                      | 2 (20.0)           | 4 (50.0)          | 0.46    |
| No                                                       |                    |                   |         |
| Retired                                                  | 6 (60.0)           | 3 (37.5)          |         |
| Other                                                    | 2 (20.0)           | 1 (12.5)          |         |
| Tobacco smoking                                          |                    |                   |         |
| Current                                                  | 1 (12.5)           | 2 (20.0)          | 0.82    |
| Ex                                                       | 5 (62.5)           | 4 (40.0)          |         |
| Never                                                    | 2 (25.0)           | 4 (40.0)          |         |
| Vigorous physical activity (hours per week) <sup>a</sup> |                    |                   |         |
| None                                                     | 3 (37.5)           | 7 (77.8)          | 0.33    |
| 1-2                                                      | 2 (25.0)           | 1 (11.1)          |         |
| >2                                                       | 3 (37.5)           | 1 (11.1)          |         |
| Take vitamin D supplements <sup>b</sup>                  | 0 (0.0)            | 0 (0.0)           | -       |
| Type of asthma/COPD                                      |                    |                   |         |
| Asthma only                                              | 2 (25.0)           | 5 (30.0)          | 0.43    |
| COPD only                                                | 4 (50.0)           | 2 (20.0)          |         |
| Combined asthma & COPD                                   | 2 (25.0)           | 3 (30.0)          |         |
| Spirometry, mean (SD)                                    |                    |                   |         |
| FEV <sub>1</sub> (L)                                     | 2.07 (0.43)        | 1.87 (0.70)       | 0.48    |
| FEV <sub>1</sub> , % predicted                           | 74 (14)            | 73 (24)           | 0.94    |

|                                             |              |             |      |
|---------------------------------------------|--------------|-------------|------|
| FVC (L)                                     | 3.02 (0.71)  | 2.80 (0.94) | 0.59 |
| FVC, % predicted                            | 84 (14)      | 85 (24)     | 0.87 |
| Ratio FEV <sub>1</sub> /FVC                 | 0.69 (0.07)  | 0.68 (0.16) | 0.86 |
| FEV <sub>1</sub> /FVC, % predicted          | 88 (7)       | 86 (18)     | 0.75 |
| PEF (L/min)                                 | 357 (108)    | 301 (132)   | 0.35 |
| Anthropometry, mean (SD)                    |              |             |      |
| Height (cm)                                 | 170.0 (10.4) | 165.3 (9.1) | 0.33 |
| Weight (kg)                                 | 83.2 (25.8)  | 73.2 (19.8) | 0.37 |
| Body mass index (kg/m <sup>2</sup> )        | 29.3 (11.0)  | 26.5 (5.2)  | 0.48 |
| Corrected serum calcium, mean (SD) (mmol/L) | 2.36 (0.09)  | 2.31 (0.14) | 0.35 |
| 25-hydroxyvitamin D (nmol/L)                |              |             |      |
| Observed, mean (SD)                         | 22.3 (9.7)   | 16.6 (8.8)  | 0.24 |
| Deseasonalized, mean (SD)                   | 21.8 (3.1)   | 18.5 (4.5)  | 0.12 |

Results are number (%) unless otherwise indicated.

Abbreviations: BMI = body mass index; FEV<sub>1</sub> = forced expiratory volume in 1 second; FVC = forced vital capacity; PEF = peak expiratory flow rate.

<sup>a</sup> Numbers do not add to total for column because of missing/don't know responses.

<sup>b</sup> ≤600 IU per day if aged 50-70 years; ≤800 IU per day if aged 71-84 years.

**Table S2:** Hazard ratios for exacerbations of asthma or chronic obstructive pulmonary disease, adjusted for other variables in the table, in the placebo group only (n=373).

| Participants                         | Hazard Ratio (95%CI) <sup>a</sup> | P-value (Wald X <sup>2</sup> ) | P-value (Wald X <sup>2</sup> ) |
|--------------------------------------|-----------------------------------|--------------------------------|--------------------------------|
| Asthma-COPD category                 |                                   |                                |                                |
| Asthma only                          | 1.96 (1.45, 2.66)                 | <0.0001                        | <0.0001                        |
| COPD only                            | 1.00                              | -                              |                                |
| Combined Asthma & COPD               | 2.10 (1.59, 2.77)                 | <0.0001                        |                                |
| Age (years)                          |                                   |                                |                                |
| 50-59                                | 1.00                              | -                              | 0.005                          |
| 60-69                                | 1.37 (1.01, 1.84)                 | 0.04                           |                                |
| 70-79                                | 0.95 (0.67, 1.34)                 | 0.76                           |                                |
| 80-84                                | 1.85 (1.14, 3.01)                 | 0.01                           |                                |
| Sex                                  |                                   |                                |                                |
| Male                                 | 1.44 (1.14, 1.83)                 | 0.003                          | 0.003                          |
| Female                               | 1.00                              | -                              |                                |
| Ethnicity                            |                                   |                                |                                |
| Māori                                | 1.82 (1.26, 2.64)                 | 0.002                          | 0.0003                         |
| Pacific Island                       | 2.15 (1.44, 3.22)                 | 0.0002                         |                                |
| South Asian                          | 1.08 (0.59, 1.98)                 | 0.80                           |                                |
| European / Other                     | 1.00                              | -                              |                                |
| 25OHD category (nmol/L) <sup>b</sup> |                                   |                                |                                |
| < 25.0                               | 1.70 (0.94, 3.07)                 | 0.08                           | 0.38                           |
| 25.0 – 49.9                          | 1.06 (0.78, 1.43)                 | 0.72                           |                                |
| 50.0 – 74.9                          | 1.04 (0.78, 1.39)                 | 0.79                           |                                |
| ≥ 75.0                               | 1.00                              | -                              |                                |

Abbreviations: 25OHD, 25-hydroxyvitamin D; 95%CI, 95% confidence interval; COPD, chronic obstructive pulmonary disease.

<sup>a</sup> Adjusted for all other variables in the table

<sup>b</sup> Based on deseasonalized concentrations
